# Supplementary material for: Phosphodiesterase 5 inhibitor mirodenafil ameliorates Alzheimer-like pathology and symptoms by multimodal actions
Source: PubMed Central journal article supplement (PMC9264543; doi:10.1186/s13195-022-01034-3), 2022-07-08
Supplement: 13195_2022_1034_MOESM1_ESM.pdf [file 13195_2022_1034_MOESM1_ESM.pdf]

Figure S1

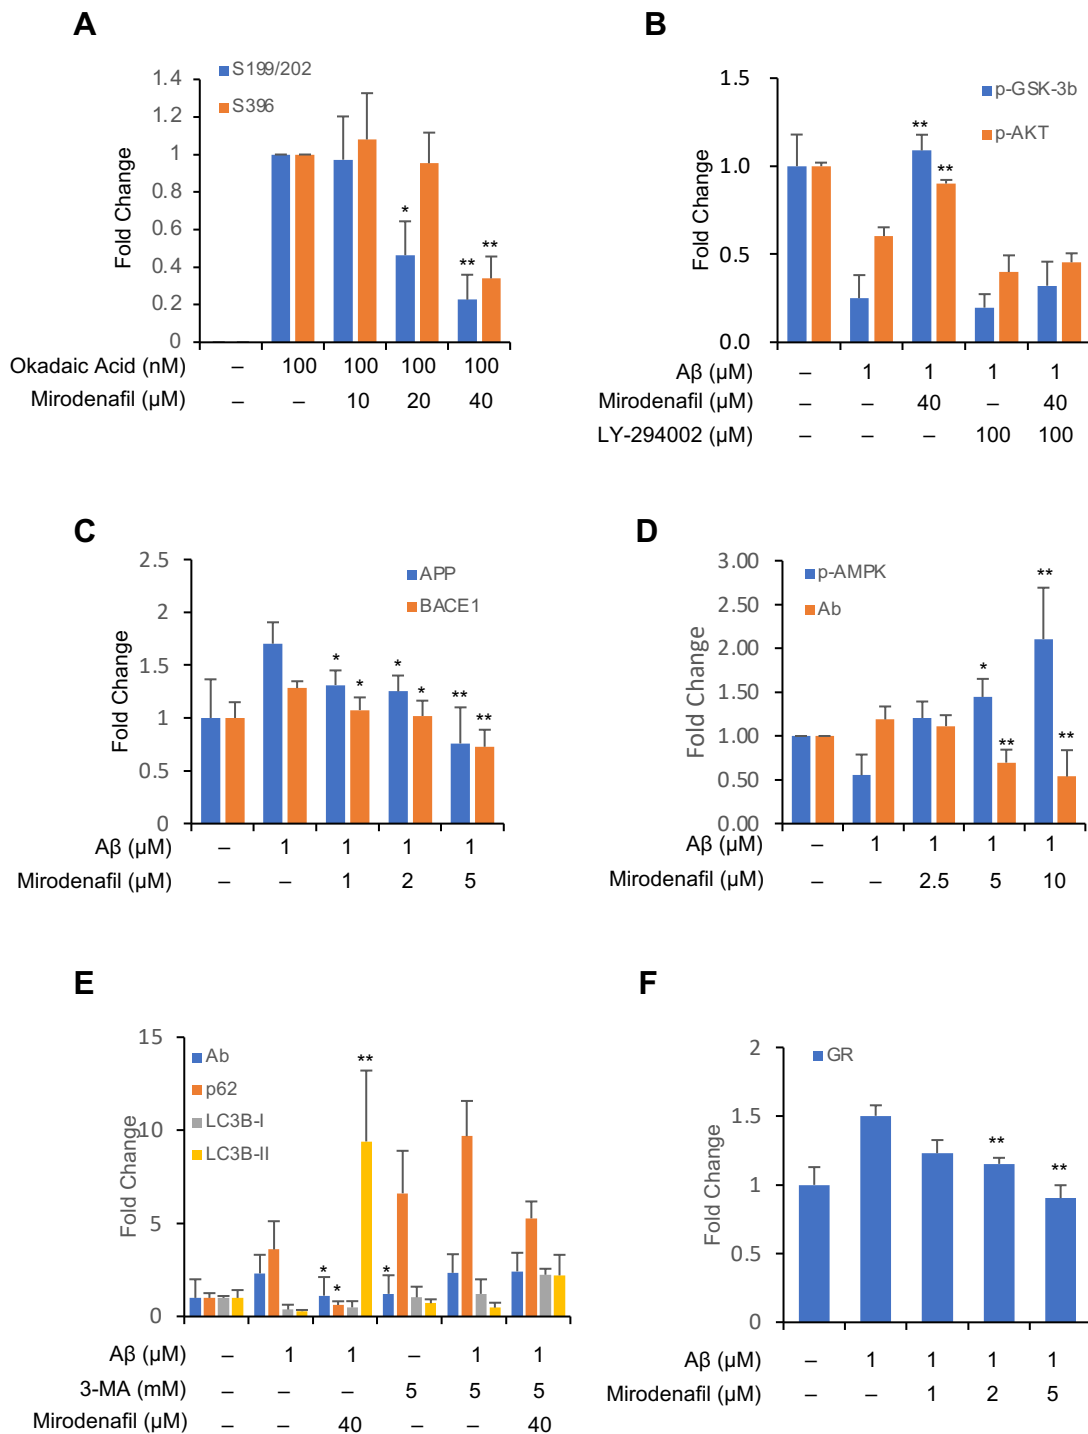

Figure S2. A

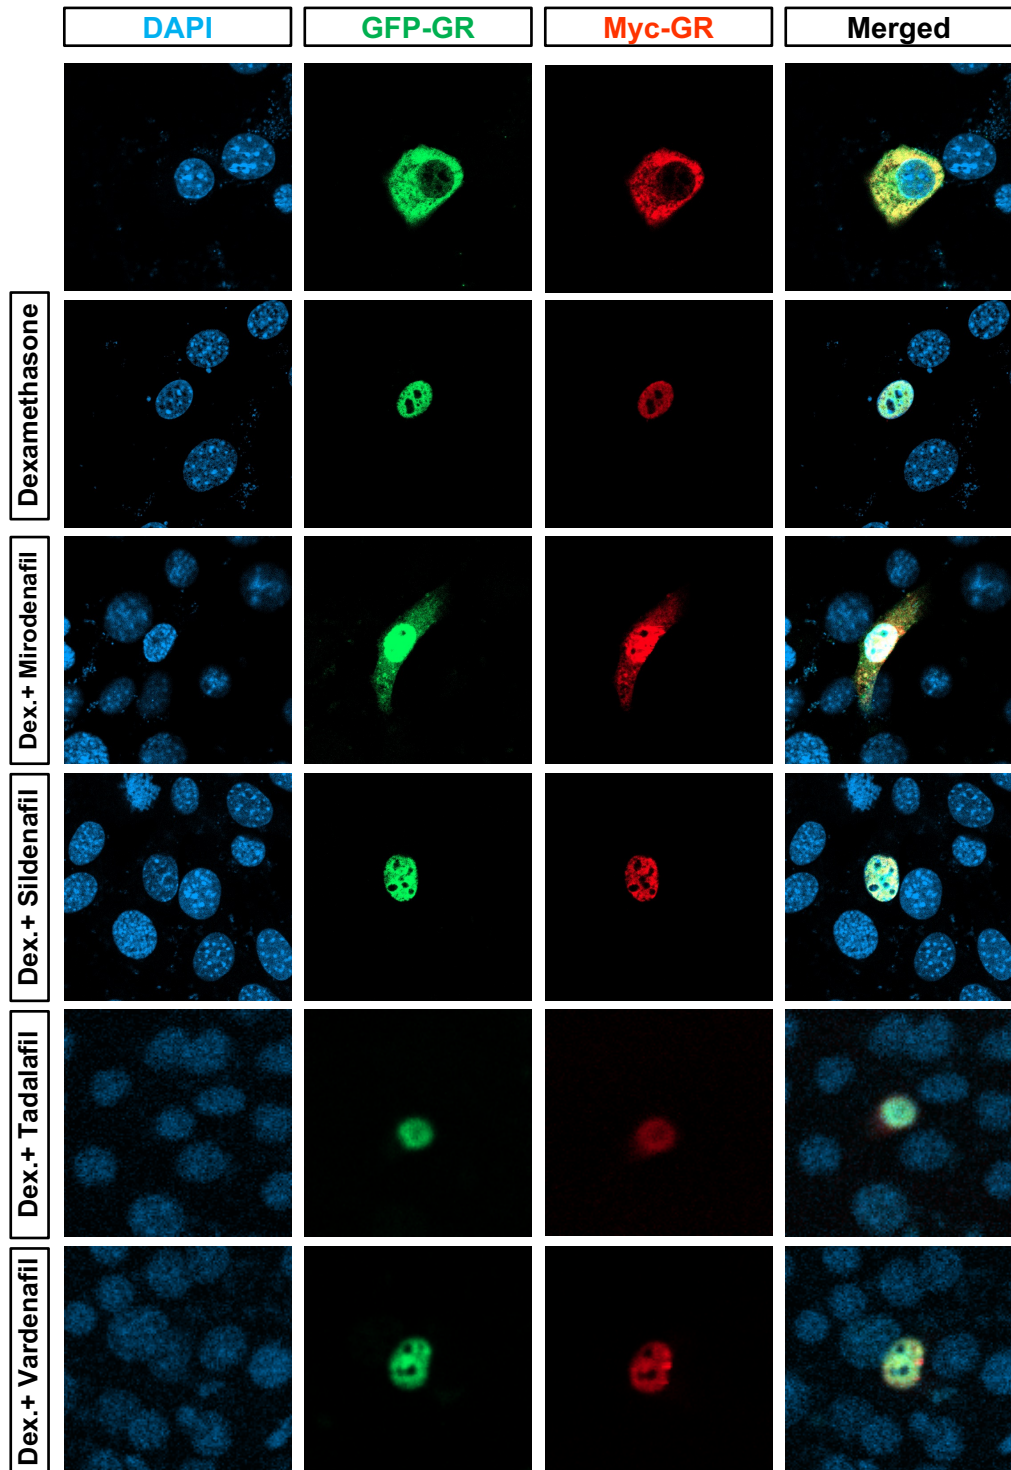

Figure S2. B

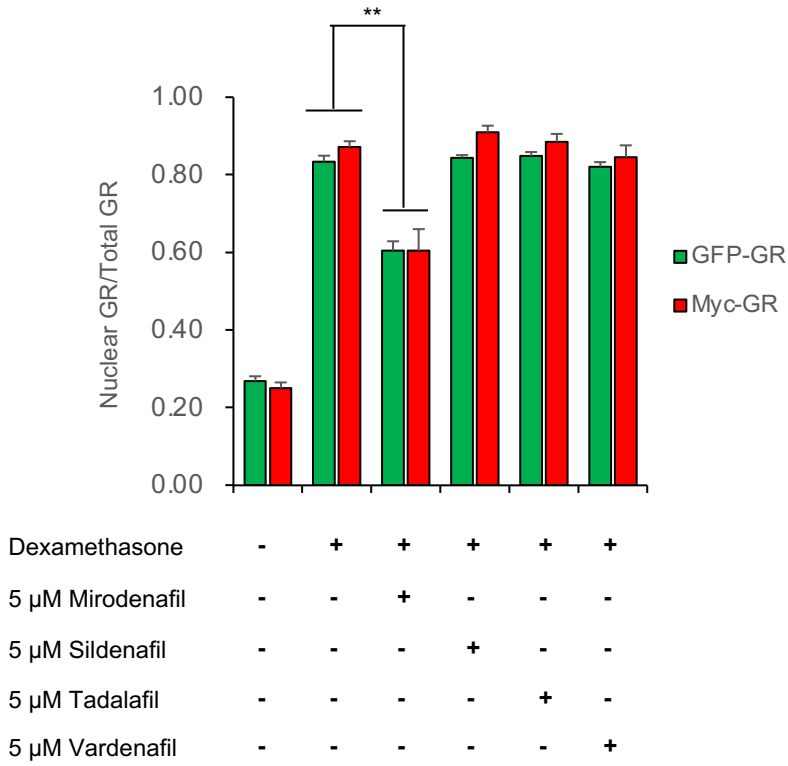

Figure S3

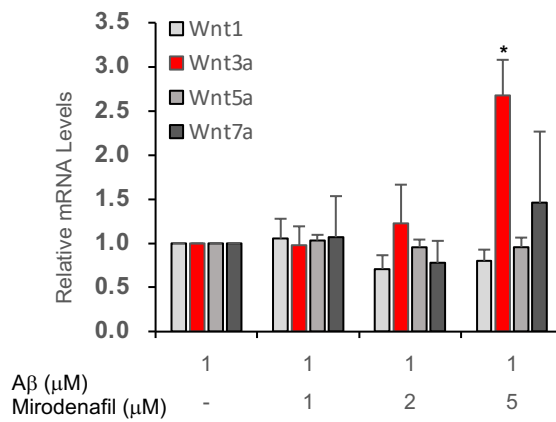

Figure S4

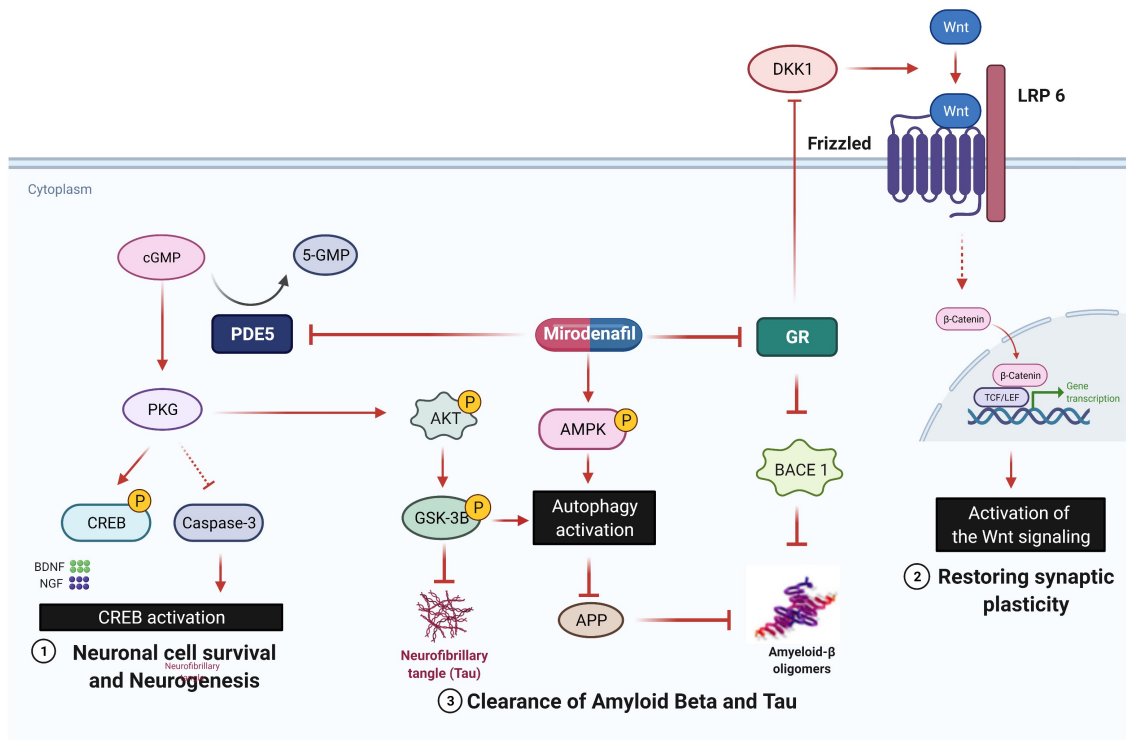

Table S1. Summary of general pharmacology study on the CNS in healthy mice

| CNS Effects                    | Testing Method       | Results compared with Vehicle Control Group |
|--------------------------------|----------------------|---------------------------------------------|
| Spontaneous Locomotor Activity | Activity Monitor     | No difference                               |
| Motor Coordination             | Rotarod Test         | No difference                               |
| Analgesia                      | Acetic Acid          | No difference                               |
|                                | Hot Plate            | No difference                               |
| Body Temperature               | Rectal Temperature   | No difference                               |
| Sleeping Time                  | Pentobarbital Sodium | No difference                               |

Table S2. Primary antibodies used

| Antibodies                | Suppliers                 | Catalog No. | Species |
|---------------------------|---------------------------|-------------|---------|
| A $\beta$ 1-42            | Abcam                     | ab12267     | Rabbit  |
| AKT                       | Cell Signaling Technology | 9272        | Rabbit  |
| Phospho-Akt (Ser473)      | Cell Signaling Technology | 4060        | Rabbit  |
| AMPK                      | Cell Signaling Technology | 2532        | Rabbit  |
| p-AMPK                    | Cell Signaling Technology | 2531        | Rabbit  |
| APP                       | Abcam                     | ab32136     | Rabbit  |
| ATG5/ATG12                | Abcam                     | ab109490    | Rabbit  |
| ATG7                      | Abcam                     | ab133528    | Rabbit  |
| BACE1                     | Cell Signaling Technology | 5606        | Rabbit  |
| BDNF                      | Abcam                     | ab108319    | Rabbit  |
| $\beta$ -ACTIN            | Santa Cruz                | sc-47778    | Mouse   |
| Caspase-3                 | Cell Signaling Technology | 9662        | Rabbit  |
| Cleaved Caspase-3         | Cell Signaling Technology | 9661        | Rabbit  |
| p-CREB (phospho S133)     | Abcam                     | ab32096     | Rabbit  |
| Dkk1                      | Abcam                     | ab61275     | Mouse   |
| GAPDH                     | Cell Signaling Technology | 2118        | Rabbit  |
| GFAP                      | Millipore                 | AB5541      | Chicken |
| Glucocorticoid Receptor   | Cell Signaling Technology | 3660        | Rabbit  |
| Phospho-GSK-3-beta (Ser9) | Cell Signaling Technology | 9322        | Rabbit  |
| LC3B                      | Cell Signaling Technology | 2775        | Rabbit  |
| NGF                       | Abcam                     | ab52918     | Rabbit  |
| p62                       | Cell Signaling Technology | 39749       | Rabbit  |
| PARP                      | Cell Signaling Technology | 9532        | Rabbit  |
| Tau                       | Cell Signaling Technology | 46687       | Rabbit  |
| pSer199/202-Tau           | Millipore                 | AB9674      | Rabbit  |
| pSer396-Tau               | Abcam                     | ab109390    | Rabbit  |

Table S3. PCR primers

| Targets | Strand | Primer sequences               | Size (bp) | T <sub>m</sub> (°C) | Origin |
|---------|--------|--------------------------------|-----------|---------------------|--------|
| APP     | S      | 5'- CTACGGAAACGACGCTCTCATG -3' | 209       | 59                  | Mouse  |
|         | AS     | 5'- CAGAACCTGGTCGAGTGGTCAG -3' |           |                     |        |
| BACE1   | S      | 5'- GGAACCCATCTCGGCATCCGG -3'  | 215       | 59                  | Mouse  |
|         | AS     | 5'- ACCAGGATGTTGAGCGTCTGTG -3' |           |                     |        |
| β-ACTIN | S      | 5'-AGAAGCTGTGCTATGTTGCTCT -3'  | 191       | 53                  | Mouse  |
|         | AS     | 5'- AGTTTCATGGATGCCACAGGAT -3' |           |                     |        |
| DKK1    | S      | 5'- TCTGCTAGGAGCCAGTGCC -3'    | 191       | 50                  | Mouse  |
|         | AS     | 5'- GATGGTGATCTTTCTGTATCC -3'  |           |                     |        |
| WNT1    | S      | 5'- CTCTTTGGCCGAGAGTTCGTGG -3' | 251       | 60                  | Mouse  |
|         | AS     | 5'- CCTCGGTTGCCGTAAGGACGC -3'  |           |                     |        |
| WNT3A   | S      | 5'- CTCGCATGGCATAGATGGGTGC -3' | 153       | 60                  | Mouse  |
|         | AS     | 5'- GCAGGTGTGCACGTCATAGAC -3'  |           |                     |        |
| WNT5A   | S      | 5'-CATGGAGTGTCTGGCTCCTG -3'    | 279       | 60                  | Mouse  |
|         | AS     | 5'- GTCCATCCCCTCTGAGGTCTTG -3' |           |                     |        |
| WNT7A   | S      | 5'- CGGGAGATCAAGCAGAATGC -3'   | 167       | 57                  | Mouse  |
|         | AS     | 5'- GCCTAGCTCTCGGAACTGTGGC -3' |           |                     |        |
